# Supplementary material for: Anti-COX-2 Autoantibody is a Novel Marker of Immune Aplastic Anemia
Source: Research Square preprint supplement (doi:10.21203/rs.3.rs-1653776/v1), 2022-05-25
Supplement: Supplementary file 1 [file bb50057ff84f7285399cb7ec.pdf]

# Supplementary Materials

|                                                                                         |    |
|-----------------------------------------------------------------------------------------|----|
| <b>Table of contents</b>                                                                | 1  |
| <b>Supplementary Figures</b>                                                            |    |
| <b>Supplementary Figure 1.</b> Determining cutoff for positivity                        | 2  |
| <b>Supplementary Figure 2</b> Missing clinical data values                              | 3  |
| <b>Supplementary Figure 3.</b> Replication of microarray data with DELFIA               | 4  |
| <b>Supplementary Figure 4.</b> Follow-up samples from the Finnish cohort                | 5  |
| <b>Supplementary Figure 5.</b> Epitope summary and SDS-PAGE Electrophoresis             | 6  |
| <b>Supplementary Figure 6.</b> Conformational peptide screen                            | 7  |
| <b>Supplementary Tables</b>                                                             |    |
| <b>Supplementary Table 1.</b> Control cohorts from clinical centers                     | 8  |
| <b>Supplementary Table 2.</b> Helsinki Biobank patient cohort                           | 9  |
| <b>Supplementary Table 3.</b> Logistic regression – all IAA patients                    | 10 |
| <b>Supplementary Table 4.</b> Formula for calculation of different test characteristics | 11 |
| <b>Supplementary Methods</b>                                                            | 12 |

## Supplementary Figure 1

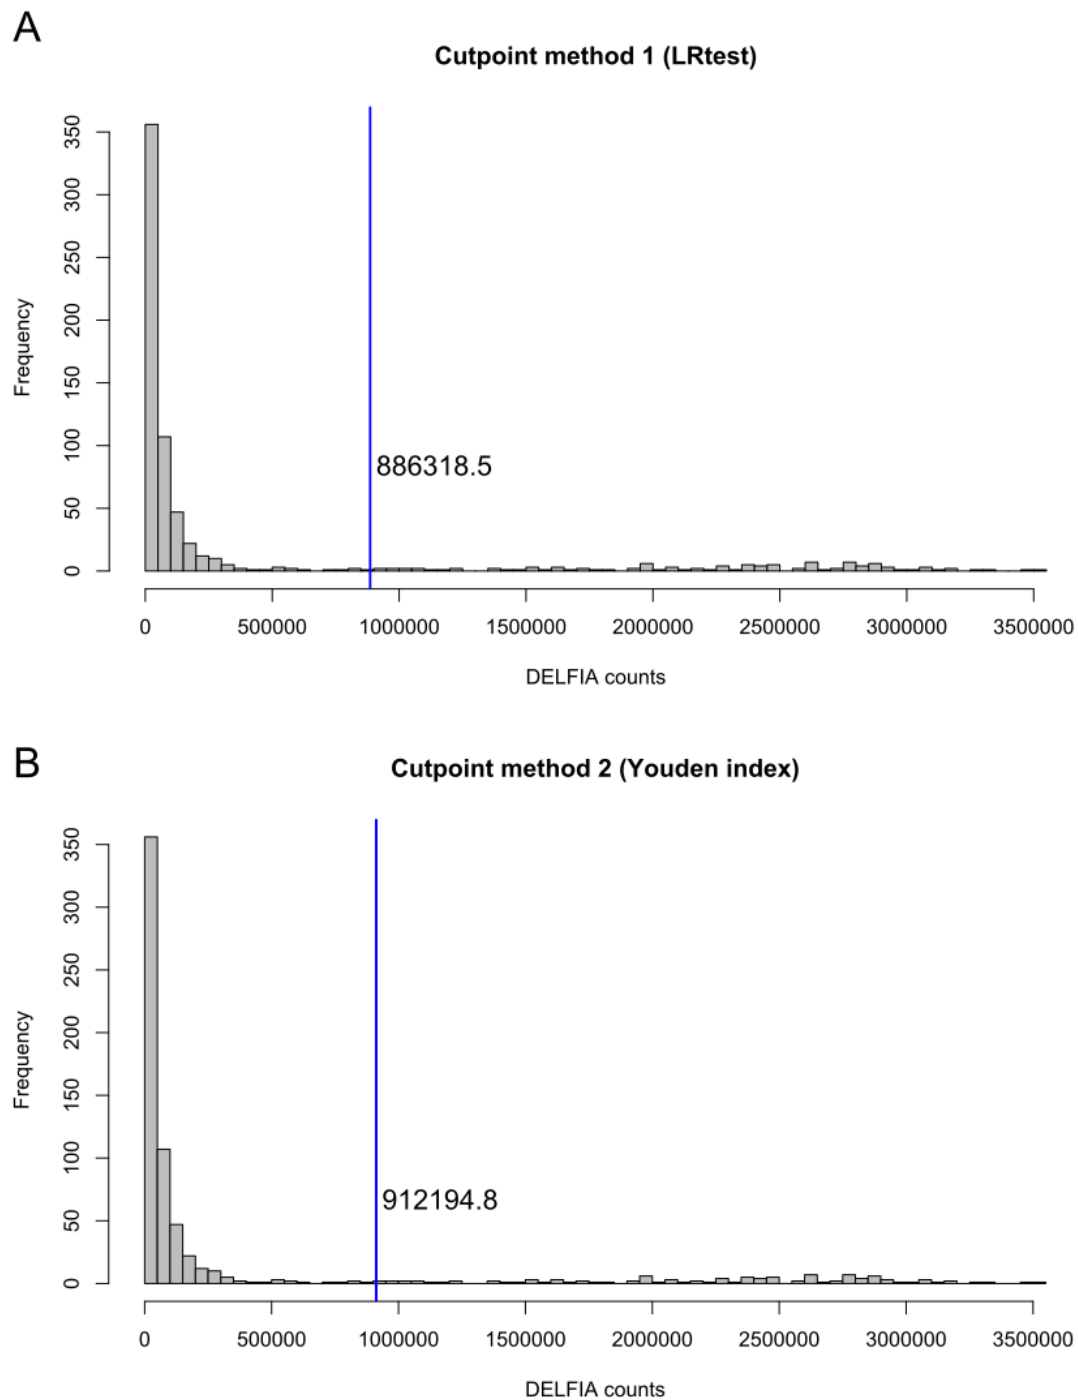

**Supplementary Figure 1.** Determining cutoff for positivity. The training data presented in histogram was combined cohorts of  $n = 681$  patients, blue line with value denotes the optimal cutoff with DELFIA counts predicting the presence of AA. (A) Using method Findcutoffs, minimizing likelihood ratio test p-value ( $p = 7.43e-32$ ) and maximizing AUC in ROC curve (0.659). (B) Using method OptimalCutPoint, maximizing Youden's  $J$  statistic ( $3.19e-01$ ).

## Supplementary Figure 2

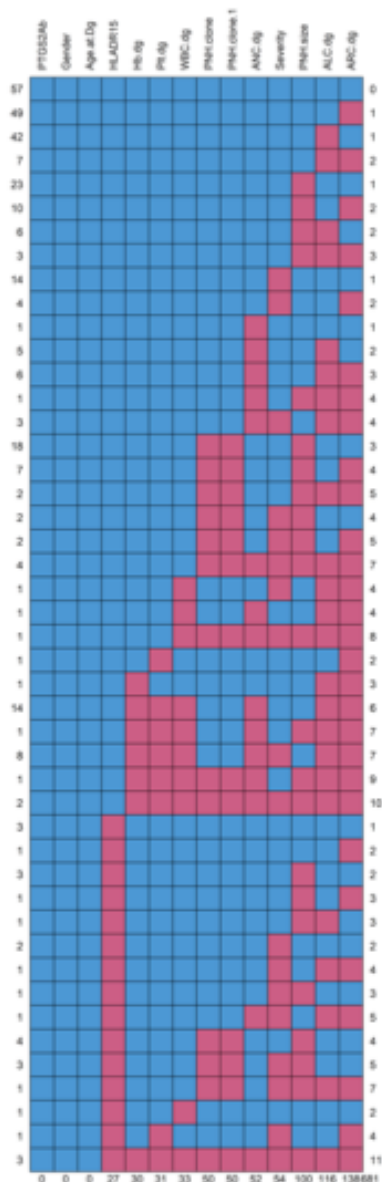

**Supplementary Figure 2.** Missingness patterns in the clinical data from adult (>18 years old) IAA patients (n=334). Blue color indicates reported variables, red color indicates missing variables. Numbers in the left indicate the number of patients who have data for all blue variables. Numbers on the right side indicate the number of patients with data missingness pattern corresponding the red squares.

Abbreviations: PTGSAb = aCOX-2 Ab, HLADR15 = Presence of HLA-DRB15\*15:01, PNH clone = Presence of the PNH clone – divided into clinical and sub-clinical, PNH clone.1 = Presence of the PNH clone, ANC = Absolute neutrophil count, ALC = Absolute lymphocyte count, ARC = Absolute reticulocyte count.

### Supplementary Figure 3

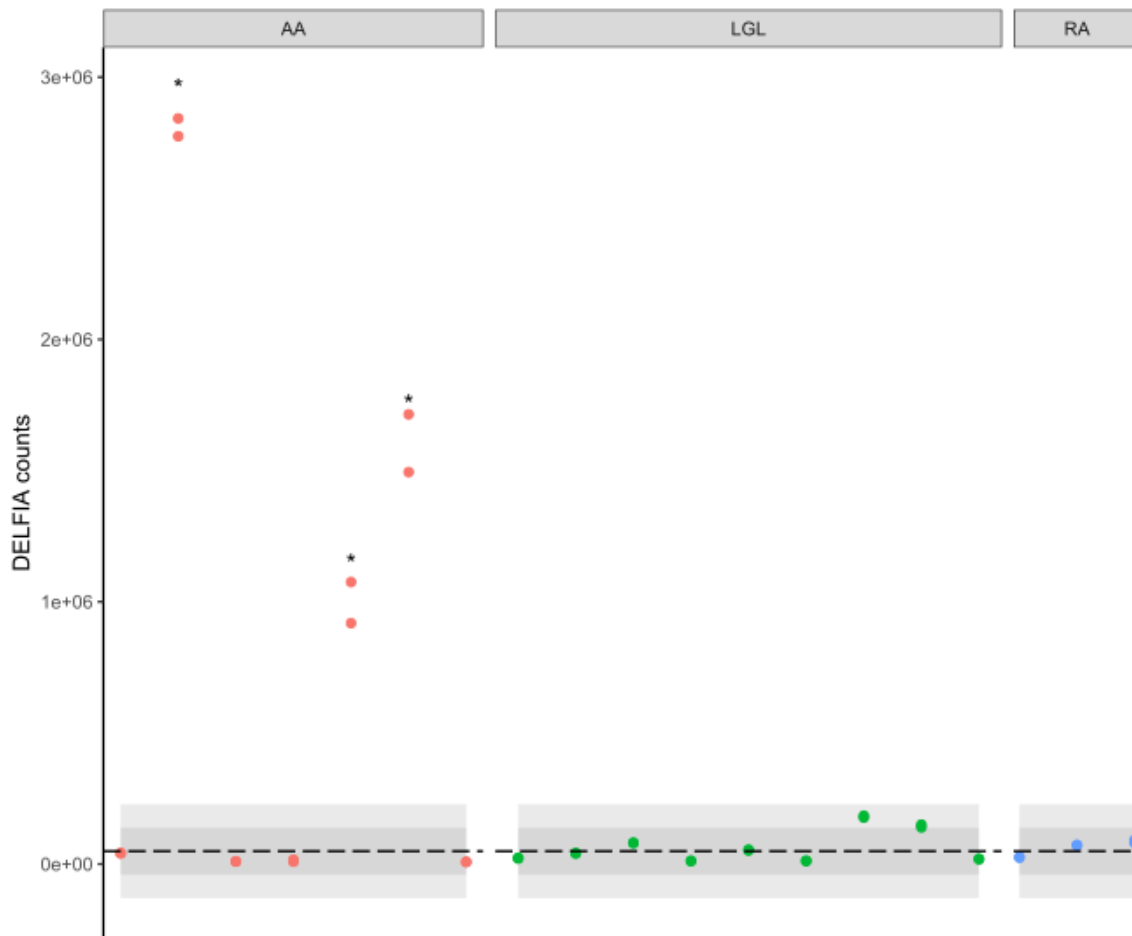

**Supplementary Figure 3.** Replication of microarray data with DELFIA. Points are duplicate measurements in DELFIA for  $n = 7$  aplastic anemia patients (AA),  $n = 9$  LGL leukemia patients (LGL) and  $n = 3$  rheumatoid arthritis patients (RA). For negative patients the duplicate points partially overlap. All cases here were also included in the microarray. Dashed line = healthy controls (HC) mean in DELFIA ( $n = 30$ ), dark grey area =  $\pm 1$  SD's of mean HC, light grey area =  $\pm 2$  SD's of mean HC, \* = denotes positive cases found positive on microarray assay.

### Supplementary Figure 4

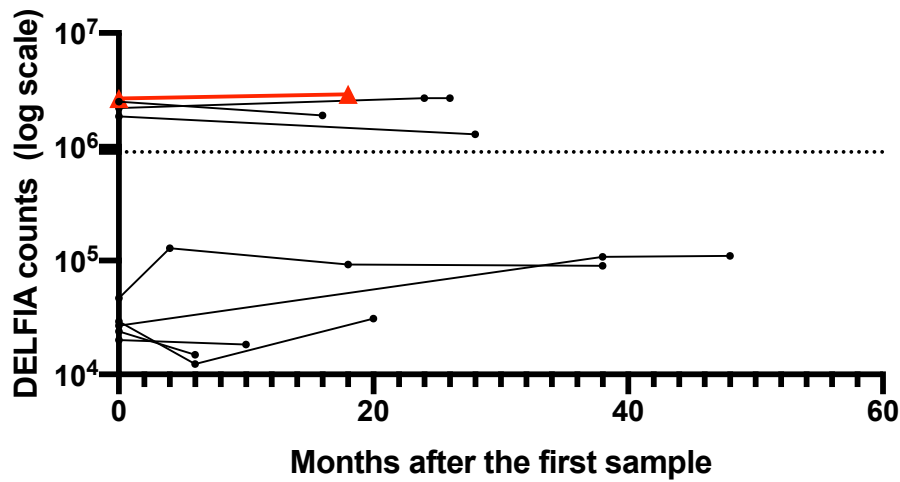

**Supplementary Figure 4.** Follow-samples from the Finnish cohort. Patient samples were collected at different time points after the initial diagnosis was set. All patients from which we obtained serial samples retained their aCOX-2 antibody status in follow-up. Timeline from the first obtained sample is presented on the x-axis. The dashed vertical line represents the cut-off for aCOX-2 Ab positivity. Red symbols indicate the patient, who presented with an aberrant immunoglobulin subclass distribution with IgG, IgM and IgA present.

## Supplementary Figure 5

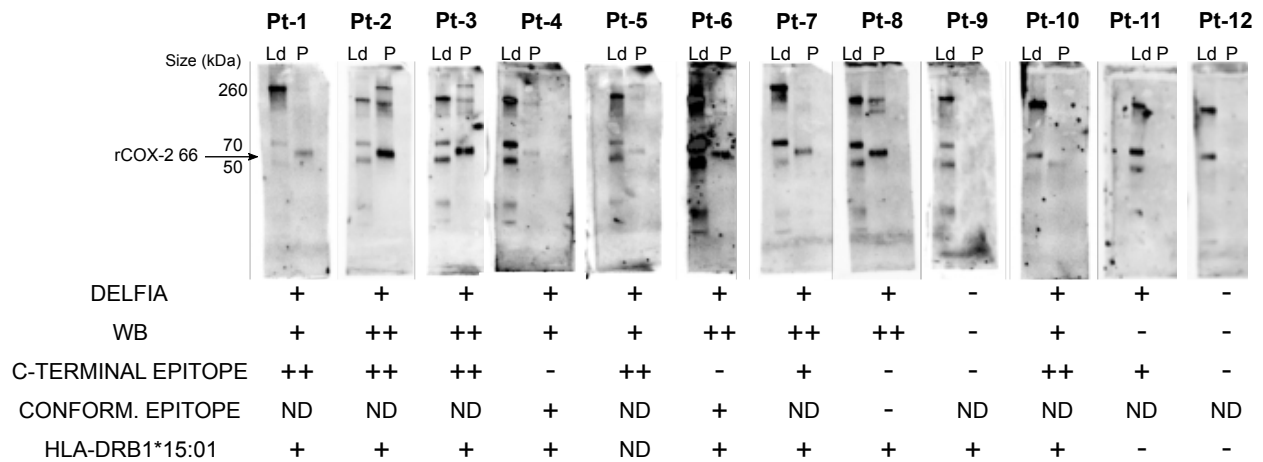

**Supplementary Figure 5. Epitope summary and SDS-PAGE Electrophoresis.** Membrane-bound recombinant COX-2 was probed with IAA patient plasma samples (n=12) with known aCOX-2 Ab status determined with DELFIA sandwich assay. Molecular weight marker is shown for each patient sample. All autoantibody-positive plasma samples from IAA patients with known HLA-DRB1\*15:01 positive genotype bound recombinant COX-2 also in its linearized form. Plasma sample from an autoantibody positive, but HLA-DRB1\*15:01 negative did not give positive signal in WB against rCOX-2.

Abbreviations: Pt, patient; Ld, ladder molecular weight marker; P, plasma sample; WB, western blot, ND, not done.

In the Delfia analysis autoantibody positive patients are marked with +.

In the WB analysis ++ denotes strong positive signal and + weaker positive signal.

In the linear epitope analysis ++ denotes strong signal from the consensus sequence in the C-terminal part of rCOX2 and + weaker signal of target outside from the consensus region.

In the conformational epitope analysis + denotes conformational epitope identified close to the C-terminal.

The presence of the HLA-DRB1\*15:01 genotype is marked with +.

## Supplementary Figure 6

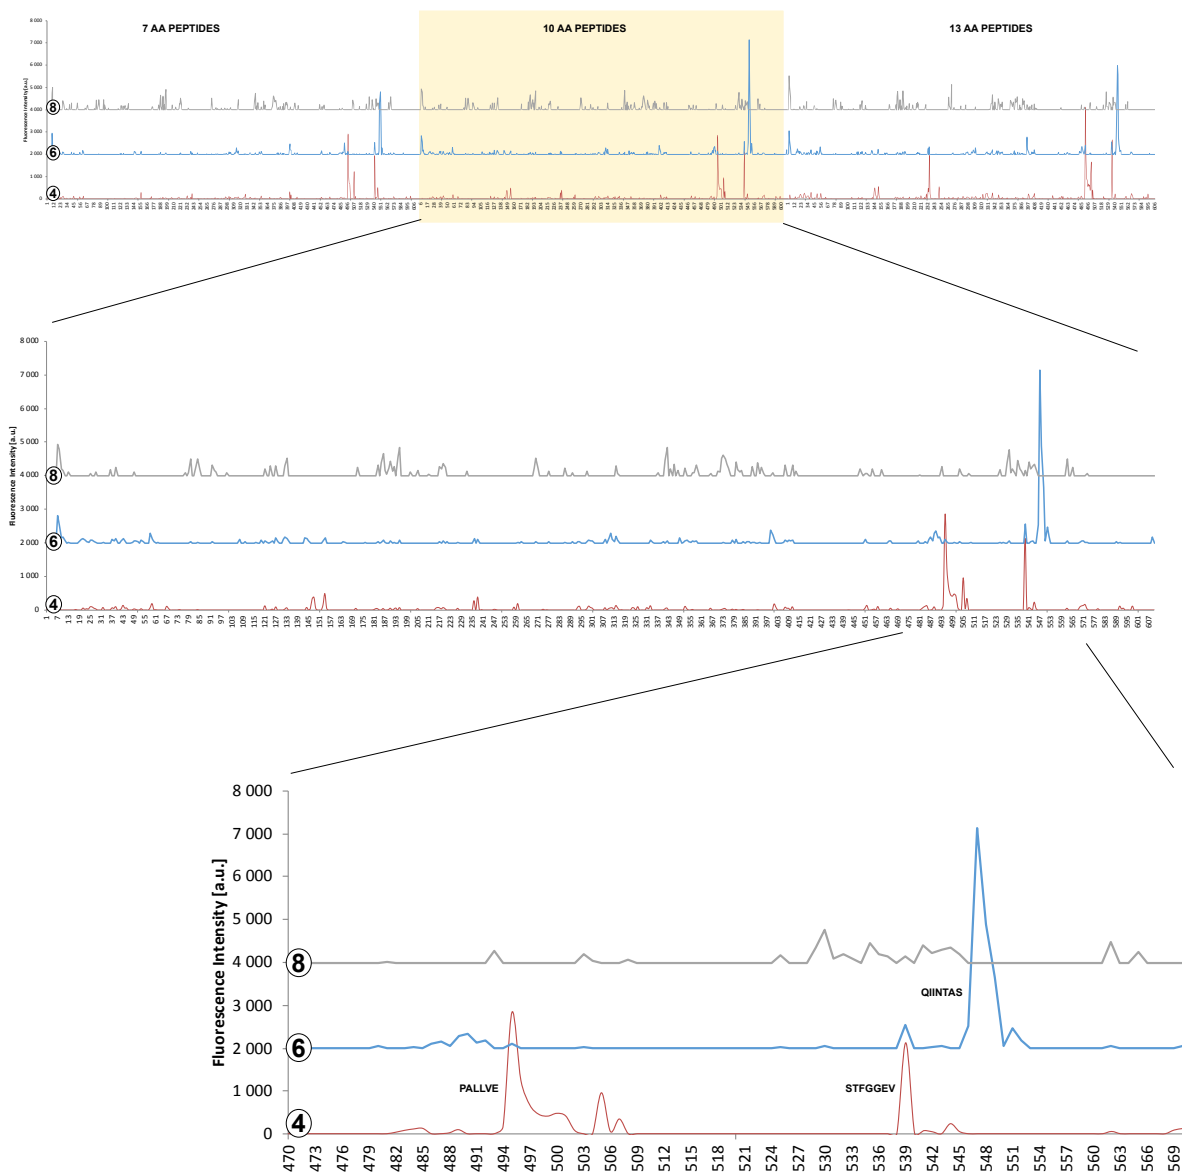

**Supplementary Figure 6.** Conformational peptide screen. The analysis was performed using cyclic, 7-, 10- and 13-mer peptides. Co parable epitopes were identified using all peptide lengths. Data obtained using the 10-mers is zoomed in to the COX-2 protein antigenic epitopes residing between amino acids 490 and 555.

## Supplementary Tables

**Supplementary Table 1.** Control cohorts

| <b>Diagnosis</b>    | <b>Number of Patients</b> | <b>NORD</b> | <b>US</b>  | <b>JPN</b> | <b>HBB</b> | <b>FHRB</b> |
|---------------------|---------------------------|-------------|------------|------------|------------|-------------|
| IAA (>18 years)     | 334                       | 37          | 209        | 88         | -          | -           |
| IAA (<18 years)     | 52                        | 1           | 46         | 5          | -          | -           |
| IAA (age not known) | 19                        | -           | 4          | 15         | -          | -           |
| HBB AA              | 12                        | -           | -          | -          | 12         | -           |
| FHRB AA             | 9                         | -           | -          | -          | -          | 9           |
| PNH                 | 16                        | 1           | 13         | 2          | -          | -           |
| MDS                 | 80                        | 16          | 15         | 34         | 17         | -           |
| ICUS/CHIP           | 8                         | 8           | -          | -          | -          | -           |
| C-BMF               | 19                        | 0           | 19         | 0          | 0          | -           |
| ITP                 | 105                       | 24          | 10         | 16         | 55         | -           |
| PRCA                | 12                        | -           | -          | 12         | -          | -           |
| LGLL                | 68                        | 49          | 19         | -          | -          | -           |
| RA                  | 51                        | 50          | -          | -          | 1          | -           |
| MS                  | 98                        | -           | -          | -          | 98         | -           |
| DM1                 | 44                        | -           | -          | -          | 44         | -           |
| Misc.AI             | 30                        | -           | -          | -          | 30         | -           |
| GVHD                | 56                        | 56          | -          | -          | -          | -           |
| NON-AI              | 154                       | -           | 2          | -          | 152        | -           |
| Healthy             | 74                        | 30          | 24         | 20         | -          | -           |
| <b>Total</b>        | <b>1241</b>               | <b>272</b>  | <b>361</b> | <b>192</b> | <b>409</b> | <b>9</b>    |

**Supplementary Table 1.** Control cohorts

Abbreviations: NORD, Samples from the Nordic countries (mostly Finland), BBANK AA, Aplastic anemia samples from Helsinki Biobank (HBB) and from The Finnish Hematology Registry and Clinical Biobank (FHRB Biobank); IAA, immune aplastic anemia; PNH, paroxysmal nocturnal hemoglobinuria; MDS, myelodysplastic syndrome; ICUS/CHIP, idiopathic cytopenia of undetermined significance/ clonal hematopoiesis of indeterminate potential; ITP, idiopathic thrombocytopenia; PRCA, pure red cell aplasia; LGLL, large granular lymphocyte leukemia; RA, rheumatoid arthritis; MS, multiple sclerosis; DM1, Type 1 diabetes; Misc. AI, miscellaneous autoimmune diseases; GVHD, graft versus host disease; NON-AI, non-autoimmune diseases

**Supplementary Table 2.** Helsinki Biobank patient cohort

| <b>Explanation</b>                           | <b>Number of Patients</b> | <b>Group</b> |
|----------------------------------------------|---------------------------|--------------|
| Myelodysplastic syndromes                    | 17                        | MDS          |
| Autoimmune or unspecified hemolysis          | 2                         | Misc. AI     |
| Hemolytic uremic syndrome                    | 1                         | NON-AI       |
| Aplastic anemia                              | 12                        | HBP IAA      |
| Neutropenia (unspecified)                    | 20                        | NON-AI       |
| Sarcoidosis                                  | 2                         | NON-AI       |
| Immunoglobulinopathy                         | 4                         | NON-AI       |
| Thyroid diseases                             | 2                         | NON-AI       |
| Diabetes mellitus type 1                     | 44                        | DM1          |
| Electrolyte problem                          | 2                         | NON-AI       |
| Multiple sclerosis                           | 98                        | MS           |
| Vasculitis (all types)                       | 15                        | NON-AI       |
| Inflammatory bowel disease                   | 2                         | Misc.AI      |
| Unspecified hepatic disease                  | 1                         | NON-AI       |
| Autoimmune hepatitis                         | 1                         | Misc.AI      |
| Malabsorption (unspecified/intolerance)      | 1                         | NON-AI       |
| Rheumatoid arthritis                         | 1                         | RA           |
| Idiopathic thrombocytopenia                  | 55                        | ITP          |
| Spondyloarthropathies                        | 1                         | NON-AI       |
| Arthrosis, any non-immunologic               | 5                         | NON-AI       |
| Systemic lupus erythematosus                 | 18                        | Misc.AI      |
| Unspecified rheumatic diseases               | 9                         | Misc.AI      |
| Systemic connective tissue diseases together | 19                        | NON-AI       |
| Vertebral/medullar/radicular problems        | 3                         | NON-AI       |
| Infection                                    | 25                        | NON-AI       |
| Unspecified tumor, malign and benign         | 31                        | NON-AI       |
| Psychiatric diseases                         | 4                         | NON-AI       |
| Pneumothorax                                 | 1                         | NON-AI       |
| Neurologic and intracranial diseases         | 6                         | NON-AI       |
| Rhinitis                                     | 1                         | NON-AI       |
| Diabetes mellitus type 2                     | 1                         | NON-AI       |
| Metabolic disorders                          | 2                         | NON-AI       |
| Unspecified gland diseases                   | 1                         | NON-AI       |
| Eye or auxilliary                            | 1                         | NON-AI       |
| Irritable bowel syndrome                     | 1                         | NON-AI       |
| <b>Total</b>                                 | <b>409</b>                |              |

**Supplementary Table 3.**

|                                   |              | aCOX-2 Ab<br>negative | aCOX-2 Ab<br>positive | OR (univariable)                          | OR (multivariable)                       |
|-----------------------------------|--------------|-----------------------|-----------------------|-------------------------------------------|------------------------------------------|
| HLA-<br>DRB*15:01                 | Absent       | 167 (89.3)            | 20 (10.7)             | -                                         | -                                        |
|                                   | Present      | 79 (43.9)             | 101 (56.1)            | <b>10.68 (6.28-18.92,<br/>p&lt;0.001)</b> | <b>6.38 (2.51-17.59,<br/>p&lt;0.001)</b> |
| Gender                            | Female       | 144 (66.1)            | 74 (33.9)             | -                                         | -                                        |
|                                   | Male         | 132 (70.6)            | 55 (29.4)             | 0.81 (0.53-1.23,<br>p=0.329)              | 1.44 (0.54-3.99,<br>p=0.465)             |
| Age at dg                         | Mean<br>(SD) | 34.3 (19.5)           | 60.7 (14.9)           | <b>1.08 (1.06-1.09,<br/>p&lt;0.001)</b>   | <b>1.09 (1.06-1.12,<br/>p&lt;0.001)</b>  |
| PNH clone                         | Absent       | 125 (74.4)            | 43 (25.6)             | -                                         | -                                        |
|                                   | Present      | 102 (59.0)            | 71 (41.0)             | <b>2.02 (1.28-3.22,<br/>p=0.003)</b>      | 1.12 (0.42-3.02,<br>p=0.824)             |
| Hb at dg<br>(g/dl)                | Mean<br>(SD) | 8.9 (2.1)             | 9.5 (9.6)             | 1.01 (0.97-1.07,<br>p=0.468)              | 1.10 (0.81-1.51,<br>p=0.532)             |
| WBC at dg<br>(10 <sup>9</sup> /l) | Mean<br>(SD) | 2.5 (1.6)             | 2.5 (1.2)             | 1.01 (0.86-1.17,<br>p=0.929)              | 1.61 (0.68-3.69,<br>p=0.267)             |
| Plt at dg<br>(10 <sup>9</sup> /l) | Mean<br>(SD) | 41.2 (44.7)           | 20.8 (16.4)           | <b>0.97 (0.96-0.98,<br/>p&lt;0.001)</b>   | <b>0.97 (0.94-0.99,<br/>p=0.024)</b>     |
| ANC at dg<br>(10 <sup>9</sup> /l) | Mean<br>(SD) | 0.9 (1.0)             | 0.8 (0.7)             | 0.88 (0.66-1.14,<br>p=0.337)              | 0.36 (0.11-1.07,<br>p=0.070)             |
| ALC at dg<br>(10 <sup>9</sup> /l) | Mean<br>(SD) | 1.3 (0.8)             | 1.4 (0.7)             | 1.17 (0.84-1.63,<br>p=0.332)              | 1.14 (0.44-2.95,<br>p=0.786)             |

**Supplementary Table 3.** Logistic regression – all IAA patients (n=405). For non-parametric variables numbers of patients together with (percentages of row totals) are reported. For parametric tests mean values together with (standard deviations, SD) are reported. PNH = paroxysmal nocturnal hemolysis. Hb = hemoglobin. WBC = white blood cells. Plt = platelets. ANC = absolute neutrophil counts. ALC = absolute lymphocyte counts. SD = standard deviation. OR = odds ratio. MI = multiple imputation.

**Supplementary Table 4.**

|                                        | <b>Formula</b>                |
|----------------------------------------|-------------------------------|
| <b>Accuracy</b>                        | $(a+d)/(a+b+c+d)$             |
| <b>Inaccuracy / Error rate</b>         | $1-\text{accuracy}$           |
| <b>Sensitivity (sens)</b>              | $a/(a+c)$                     |
| <b>95 % confidence interval</b>        |                               |
| <b>Specificity (spec)</b>              | $d/(b+d)$                     |
| <b>95 % confidence interval</b>        |                               |
| <b>Youden's Index</b>                  | $(\text{sens}+\text{spec})-1$ |
| <b>False positive rate (FPR)</b>       | $b/(b+d)=1-\text{spec}$       |
| <b>False negative rate (FNR)</b>       | $c/(a+c)=1-\text{sens}$       |
| <b>Positive likelihood ratio (LR+)</b> | $\text{sens}/(1-\text{spec})$ |
| <b>Negative likelihood ratio (LR)</b>  | $(1-\text{sens})/\text{spec}$ |
| <b>Positive predictive value (PPV)</b> | $a/(a+b)$                     |
| <b>Negative predictive value (NPV)</b> | $d/(c+d)$                     |
| <b>Predictive summary index (PSI)</b>  | $\text{PPV}+\text{NPV}-1$     |
| <b>Diagnostic odds ratio (DOR)</b>     | $(a/c)/(b/d)$                 |

\*\*\*\*\*

|                     |                 | <b>True status</b>       |                         |
|---------------------|-----------------|--------------------------|-------------------------|
|                     |                 | <b>Condition present</b> | <b>Condition absent</b> |
| <b>Test outcome</b> | <b>Positive</b> | (a) True positive        | (b) False positive      |
|                     | <b>Negative</b> | (c) False negative       | (d) True negative       |

**Supplementary Table 4.** Formula for calculation of different diagnostic test characteristics.

## Supplementary Methods

### Linear epitope mapping

Both linear and conformational epitopes were mapped using the PEPperPRINT® technology. The sequence of prostaglandin G/H synthase 2 (UniProt ID P35354) was elongated with neutral GSGSGSG linkers at the C- and N-terminus to avoid truncated peptides. The elongated antigen sequence was translated into linear 15 amino acid peptides with a peptide-peptide overlap of 14 amino acids for high-resolution epitope mapping. The prostaglandin G/H synthase 2 peptide microarrays contained 604 different peptides printed in duplicate (1,208 peptide spots) and were framed by additional HA (YPYDVPDYAG) and polio (KEVPALTAVETGAT) control peptides (44 peptide spots each control).

Plasma dilutions of 1:500 and 1:100 were incubated and the signal was detected with goat anti-human IgG (Fc) DyLight680 (0.1 µg/ml) secondary antibody. Mouse monoclonal anti-HA (12CA5) DyLight800 (0.5 µg/ml) was used as control antibody. Measurements were made with LI-COR Odyssey Imaging System; scanning offset 0.65 mm, resolution 21 µm, scanning intensities of 7/7 (red = 700 nm/green = 800 nm).

### Conformational epitope mapping

The elongated antigen sequence was translated into 7, 10 and 13 amino acid peptides with a peptide-peptide overlap of 6, 9 and 12 amino acids. After peptide synthesis, all peptides were cyclized via a thioether linkage between a C-terminal cysteine and an appropriately modified N-terminus. The conformational prostaglandin G/H synthase 2 peptide microarrays contained 1,827 different peptides printed in duplicate (3,654 peptide spots) and were framed by additional HA (YPYDVPDYAG, 64 spots) and polio (KEVPALTAVETGAT, 62 spots) control peptides. Detection as in linear epitope mapping.
